# Supplementary material
Source: Elsevier journal article supplement (https://www.sciencedirect.com/science/article/pii/S0211139X16300452)
Supplement: mmc5 [file S0211139X16300452:mmc5.pdf]

### Material complementario

**Vídeo A:** Ecocardiograma transtorácico plano apical de cuatro cámaras que muestra aumento concéntrico de espesores de la pared del ventrículo izquierdo con un aspecto birrefringente y moteado del miocardio y contractilidad miocárdica conservada.

**Vídeo B:** Ecocardiograma transesofágico, vista de eje largo de válvula aórtica, que muestra apertura muy limitada de esta.

**Vídeo C:** Ecocardiograma transesofágico, vista de eje corto de válvula aórtica que muestra su aspecto moderadamente calcificado con apertura reducida

**Vídeo D:** Resonancia magnética cardíaca secuencias de cine en cuatro cámaras, mostrando
